# Supplementary material for: Impact of carbamazepine on SMARCA4 (BRG1) expression in colorectal cancer: modulation by KRAS mutation status
Source: PubMed Central journal article supplement (PMC10944448; doi:10.1007/s10637-024-01418-2), 2024-03-06
Supplement: 10637_2024_1418_MOESM1_ESM.pdf [file 10637_2024_1418_MOESM1_ESM.pdf]

# Supplementary Figure 1

(A)

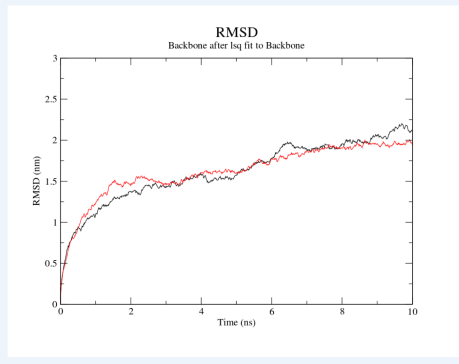

(B)

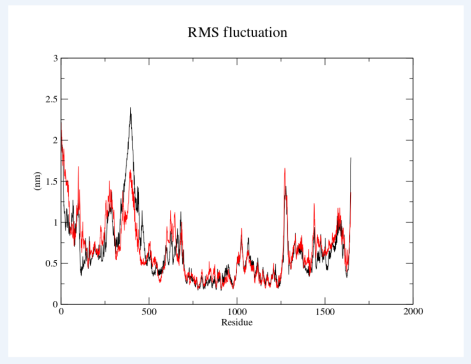

Black = *KRAS* wt complex,  
Red = *KRAS* mut complex

(C)

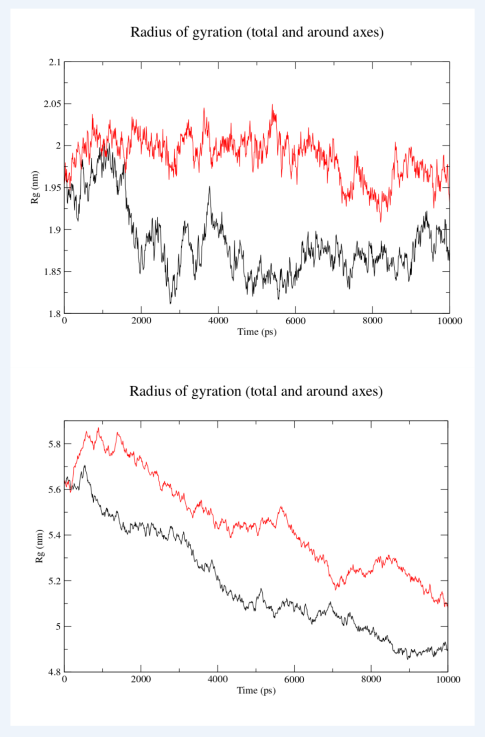

(D)

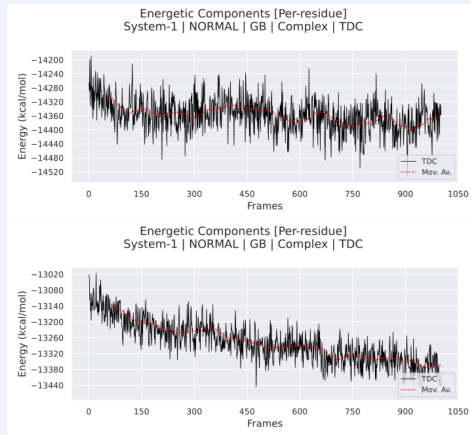

(E)

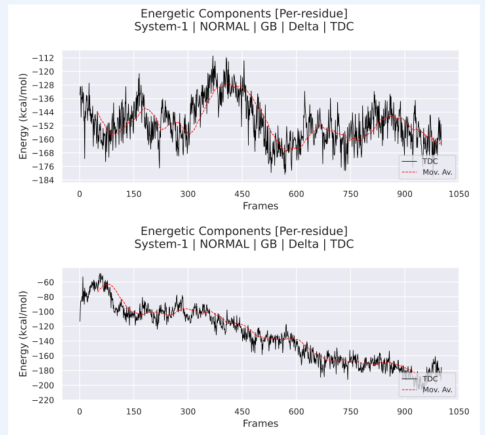

Top: *KRAS* mut complex  
Bottom: *KRAS* wt complex

Top: *KRAS* mut complex  
Bottom: *KRAS* wt complex
