# Supplementary material for: Impact of carbamazepine on SMARCA4 (BRG1) expression in colorectal cancer: modulation by KRAS mutation status
Source: PubMed Central journal article supplement (PMC10944448; doi:10.1007/s10637-024-01418-2), 2024-03-06
Supplement: 10637_2024_1418_MOESM2_ESM.pdf [file 10637_2024_1418_MOESM2_ESM.pdf]

**Supplementary Table 1.** Complex and Delta energies of *KRAS*-wt and G13D Interactions with *SMARCA4*

|                                                    | <b>Complex</b> | <b>Delta</b> |
|----------------------------------------------------|----------------|--------------|
| <b>KRAS-wt - <i>SMARCA4</i> Average</b>            | -13,277.6      | -133.5       |
| <b>KRAS-wt - <i>SMARCA4</i> Standard Deviation</b> | 78.3           | 37.6         |
| <b>G13D - <i>SMARCA4</i> Average</b>               | -14,357.7      | -150.6       |
| <b>G13D - <i>SMARCA4</i> Standard Deviation</b>    | 47.3           | 12.9         |
