# Supplementary material for: Impact of carbamazepine on SMARCA4 (BRG1) expression in colorectal cancer: modulation by KRAS mutation status
Source: PubMed Central journal article supplement (PMC10944448; doi:10.1007/s10637-024-01418-2), 2024-03-06
Supplement: 10637_2024_1418_MOESM3_ESM.pdf [file 10637_2024_1418_MOESM3_ESM.pdf]

**Supplementary Table 2.** Vina docking cores for *SMARCA4* binding with CBZ forms

| <b>CBZ</b> | <b><i>t</i>-CBZ</b> | <b>CBZ-<i>q</i></b> |
|------------|---------------------|---------------------|
| -7.9       | -8.0                | -7.9                |
