# Supplementary material for: Impact of carbamazepine on SMARCA4 (BRG1) expression in colorectal cancer: modulation by KRAS mutation status
Source: PubMed Central journal article supplement (PMC10944448; doi:10.1007/s10637-024-01418-2), 2024-03-06
Supplement: 10637_2024_1418_MOESM4_ESM.pdf [file 10637_2024_1418_MOESM4_ESM.pdf]

**Supplementary Table 3. Residues of interaction between SMARCA4 and CBZ forms**

| <b>CBZ</b> | <b><i>t</i>-CBZ</b> | <b>CBZ-<i>q</i></b> |
|------------|---------------------|---------------------|
| Glu780     | Glu780              | —                   |
| Met781     | Met781              | —                   |
| Gly782     | Gly782              | —                   |
| Leu783     | Leu783              | —                   |
| Gly784     | Gly784              | —                   |
| Lys785     | Lys785              | —                   |
| Thr786     | Thr786              | —                   |
| —          | Ile187              | —                   |
| Thr814     | Thr814              | —                   |
| Asn817     | Asn817              | —                   |
| Trp818     | Trp818              | —                   |
| —          | Glu821              | —                   |
| Asp881     | Asp881              | —                   |
| Glu882     | Glu882              | —                   |
| Thr910     | —                   | —                   |
| Gly911     | —                   | —                   |
| —          | —                   | Ile1039             |
| —          | —                   | Met1040             |
| —          | —                   | Arg1157             |
| Gly1162    | Gly1162             | —                   |
| Leu1163    | Leu1163             | —                   |
| —          | —                   | Asp1177             |
| —          | —                   | Trp1178             |
| —          | —                   | Asn1179             |
| —          | —                   | Gln1182             |
| Gln1185    | —                   | —                   |
| Arg1189    | Arg1189             | —                   |
| Arg1192    | Arg1192             | —                   |
| —          | —                   | Asp1378             |
| —          | —                   | Tyr1879             |
| —          | —                   | Ser1380             |
